# Supplementary material for: Modeled microgravity alters apoptotic gene expression and caspase activity in the squid-vibrio symbiosis
Source: PubMed Central journal article supplement (PMC9389742; doi:10.1186/s12866-022-02614-x), 2022-08-18
Supplement: 12866_2022_2614_MOESM4_ESM.pdf [file 12866_2022_2614_MOESM4_ESM.pdf]

# Function

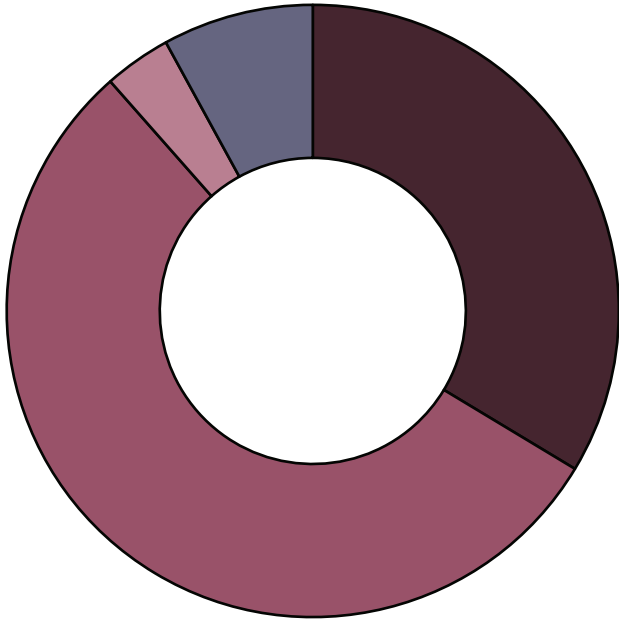

# Pathway

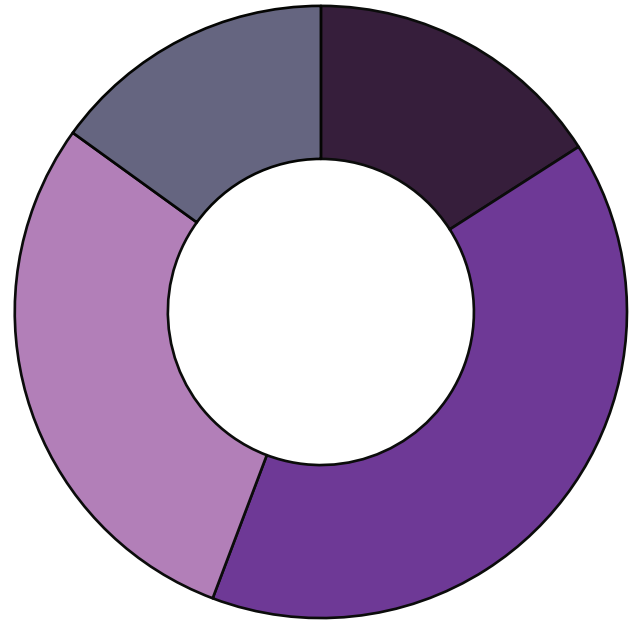

|                     |            |
|---------------------|------------|
| <b>Negative</b>     | <b>34%</b> |
| <b>Positive</b>     | <b>55%</b> |
| <b>Variant</b>      | <b>3%</b>  |
| <b>Undetermined</b> | <b>8%</b>  |

|                     |            |
|---------------------|------------|
| <b>Extrinsic</b>    | <b>16%</b> |
| <b>Intrinsic</b>    | <b>40%</b> |
| <b>General</b>      | <b>29%</b> |
| <b>Undetermined</b> | <b>15%</b> |

## Apoptosis-related genes in *Euprymna scolopes*

|                        |     |
|------------------------|-----|
| Transcripts            | 293 |
| Unique apoptosis genes | 137 |
