# Supplementary material for: Modeled microgravity alters apoptotic gene expression and caspase activity in the squid-vibrio symbiosis
Source: PubMed Central journal article supplement (PMC9389742; doi:10.1186/s12866-022-02614-x), 2022-08-18

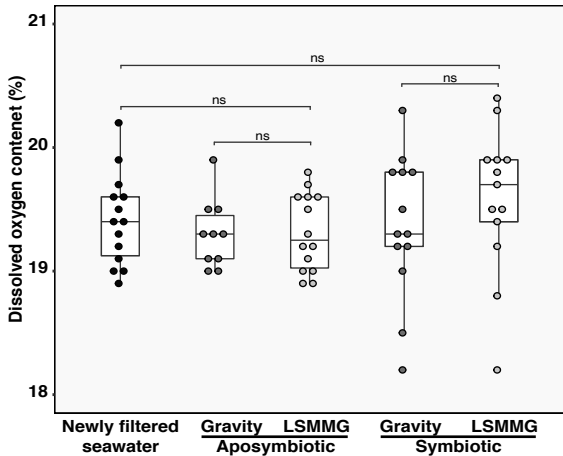

Supplement: 12866_2022_2614_MOESM5_ESM.pdf [file 12866_2022_2614_MOESM5_ESM.pdf]
