# Supplementary material for: Modeled microgravity alters apoptotic gene expression and caspase activity in the squid-vibrio symbiosis
Source: PubMed Central journal article supplement (PMC9389742; doi:10.1186/s12866-022-02614-x), 2022-08-18
Supplement: 12866_2022_2614_MOESM7_ESM.pdf [file 12866_2022_2614_MOESM7_ESM.pdf]

### Initiator Caspases

| Caspase | C8  | C10_2 | C10_1 | C9  | C2_1 | C2_2 |
|---------|-----|-------|-------|-----|------|------|
| C8      | 100 |       |       |     |      |      |
| 10_2    | 29  | 100   |       |     |      |      |
| C10_1   | 25  | 95    | 100   |     |      |      |
| C9      | 26  | 94    | 95    | 100 |      |      |
| C2_1    | 15  | 16    | 18    | 16  | 100  |      |
| C2_2    | 22  | 24    | 22    | 22  | 26   | 100  |

### Executioner Caspases

| Caspase | C7_2 | C7_4 | C3_2 | C7_1 | C7_3 | C3_1 |
|---------|------|------|------|------|------|------|
| C7_2    | 100  |      |      |      |      |      |
| C7_4    | 91   | 100  |      |      |      |      |
| C3_2    | 35   | 42   | 100  |      |      |      |
| C7_1    | 34   | 40   | 40   | 100  |      |      |
| C7_3    | 41   | 47   | 49   | 48   | 100  |      |
| C3_1    | 37   | 41   | 47   | 55   | 53   | 100  |
