# Supplementary material for: Modeled microgravity alters apoptotic gene expression and caspase activity in the squid-vibrio symbiosis
Source: PubMed Central journal article supplement (PMC9389742; doi:10.1186/s12866-022-02614-x), 2022-08-18
Supplement: 12866_2022_2614_MOESM9_ESM.pdf [file 12866_2022_2614_MOESM9_ESM.pdf]

**Table S2.** Caspase homolog sequence information

| Initiator*  | Accession        | Length | Executioner | Accession         | Length |
|-------------|------------------|--------|-------------|-------------------|--------|
| HsCasp10    | ABJ53426.1       | 522    | HsCasp7     | BAG70095.1        | 336    |
| DrCasp10    | AWP39897.1       | 512    | RnCasp7     | XP_038945156.1    | 303    |
| XlCasp10    | BAA94751.1       | 520    | DrCasp7     | AWP39893.1        | 350    |
| EsCasp10_X1 | g27226.t1        | 634    | XlCasp7     | NP_001091272.1    | 319    |
| EsCasp10_X2 | c48267_f2p0_2198 | 298    | MgCasp7     | VDI00435.1        | 410    |
| HsCasp8     | XP_005246942.1   | 523    | OsCasp7     | XP_029636882.1    | 283    |
| RnCasp8     | XP_006245077.1   | 482    | EsCasp7_X1  | g28980.t1         | 337    |
| DrCasp8     | XP_685430.4      | 520    | EsCasp7_X2  | c34060_f1p3_1826  | 371    |
| XlCasp8     | NP_001081410.1   | 520    | EsCasp7_X3  | TR562630 c0_g1_i1 | 297    |
| MgCasp8     | VDH92081.1       | 595    | EsCasp7_X4  | g36411.t1         | 213    |
| OsCasp8     | XP_029649523.1   | 502    | HsCasp3     | AAO25654.1        | 277    |
| EsCasp8     | g57293.t1        | 560    | RnCasp3     | NP_037054.1       | 277    |
| HsCasp2     | AAH02427.2       | 452    | DrCasp3     | XP_005173133.1    | 285    |
| RnCasp2     | XP_038964243.1   | 470    | XlCasp3     | NP_001081225.1    | 282    |
| DrCasp2     | AWP39887.1       | 437    | MgCasp3     | VDI74419.1        | 330    |
| XlCasp2     | BAA94746.1       | 423    | OsCasp3     | XP_029648145.1    | 258    |
| MgCasp2     | ADZ24778.1       | 468    | EsCasp3_X1  | g65085.t1         | 313    |
| OsCasp2     | XP_029647478.1   | 399    | EsCasp3_X2  | g19225.t1         | 365    |
| EsCasp2_X1  | g84175.t1        | 591    |             |                   |        |
| EsCasp2_X2  | g71066.t1YRD6    | 368    |             |                   |        |
| HsCasp9     | XP_011540575.1   | 421    |             |                   |        |
| RnCasp9     | AAF85658.1       | 454    |             |                   |        |
| DrCasp9     | NP_001007405.2   | 436    |             |                   |        |
| XlCasp9     | BAA94750.1       | 399    |             |                   |        |
| MgCasp9     | VDH91938.1       | 505    |             |                   |        |
| EsCasp9     | TR95203 c0_g1    | 408    |             |                   |        |

\*Es, *Euprymna scolopes*; Hs, *Homo sapiens*; Rn, *Rattus norvegicus*; Dr, *Danio rerio*; Xl, *Xenopus laevis*; Mg, *Mytilus galloprovincialis*; Os, *Octopus sinensis*.
